# Supplementary material
Source: publisher site journal article supplement (https://www.dovepress.com/article/supplementary_file/603089/603089%20Supplementary%20Material.docx)
Supplement: Supplementary file 1 [file 603089%20Supplementary%20Material.docx]

**SUPPLEMENTAL MATERIALS**

**Supplemental Table 1. Inclusion criteria for the trials included in the analysis**

|  | **Exacerbations 003 6** | **SUN  7** | **PINNACLE 3 11** | **ACCLAIM I 12** | **ACCLAIM II 12** |
| --- | --- | --- | --- | --- | --- |
| Age (years) | ≥40 | ≥40 | 40-80 | ≥40 | ≥40 |
| COPD | Moderate to very severe | Moderate to very severe | Moderate to very severe | n/a | n/a |
| Smoking history | Current or former | Current or former | Current or former | Current or former | Current or former |
| Pack-year | ≥10 | ≥10 | ≥10 | ≥10 | ≥10 |
| Pre-bronchodilator FEV1 %p.n. | ≤50% | ≤50% | n/a | n/a | n/a |
| Post-bronchodilator FEV1 %p.n. | n/a | n/a | <80% | <80% | <80% |
| Post-bronchodilator FEV1/FVC | <70% | <70% | <70% | ≤70% | ≤70% |
| mMRC scale | Score of ≥2 | Score of ≥2 | n/a | n/a | n/a |
| Exacerbation history within 12 months | Yes | Yes | N/A | N/A | N/A |

COPD, chronic obstructive pulmonary disease; FEV1, forced expiratory volume in 1 second; FVC, forced vital capacity; mMRC, Modified Medical Research Council; N/A, not applicable; n/a, not available; %p.n., percent predicted normal value.
